# Supplementary material
Source: Springer Nature journal article supplement (https://www.springermedizin.de/resource/supplementary/12916_2014_958_MOESM3_ESM.pdf/9598914)
Supplement: MOESM3 [file 9598914]

Study ID                      N Act   Mean Act   SD Act   N Plac   Mean Plac   SD Plac   RCI

hg   ci-   ci+   z   p   w

*Five-grass tablet*

Wahn 2009                      131      3.25    2.86    135      4.51    2.93   -27.9

Didier 2007                      136      3.58    2.98    148      4.93    3.23   -27.4

Cox 2012                        208      3.21    4.54    228      4.16    4.51   -22.8

Didier 2011 2m                    147      3.38    3.21    165      5.28    3.94   -37.7

Didier 2011 4m                    149      3.46    3.63    165      5.28    3.94   -34.8

*Timothy tablet*

Nelson 2011                      208      3.83    4.33    225      4.69    4.5    -18.3

Blaiss 2011                      173      3.71    4.88    167      4.91    5.16   -24.4

Bufe 2009                        117      2.67    2.38    121      3.17    2.14   -15.8

Durham 2010                      160      2.56    2.2     127      3.59    2.8    -28.7

Durham 2006                      294      2.51    2.66    286      3.18    2.69   -21.1

Murphy 2013                      163      5.69    4.98    166      6.06    5.98   -6.1

TOTAL N                        3819

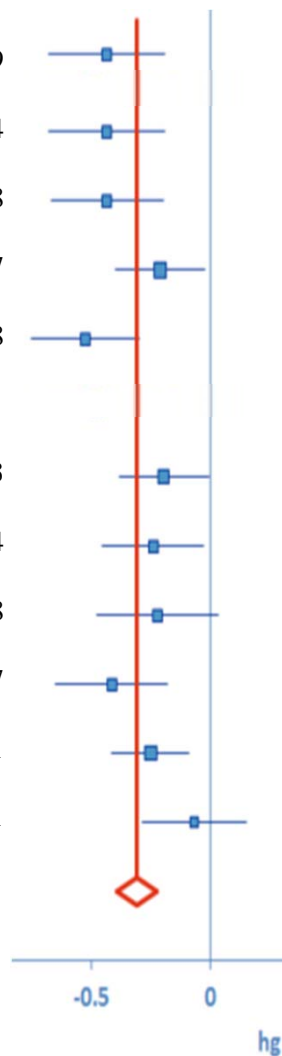

-0.43 -0.68 -0.19 -3.50 0.000 7.0%

-0.43 -0.67 -0.20 -3.60 0.000 7.4%

-0.21 -0.40 -0.02 -2.18 0.029 11.4%

-0.52 -0.75 -0.30 -4.54 0.000 8.2%

-0.48 -0.70 -0.25 -4.17 0.000 8.2%

-0.19 -0.38 -0.01 -2.01 0.044 11.3%

-0.24 -0.45 -0.03 -2.19 0.028 8.9%

-0.22 -0.48 0.03 -1.69 0.090 6.2%

-0.41 -0.65 -0.18 -3.44 0.001 7.5%

-0.25 -0.41 -0.09 -3.00 0.003 15.2%

-0.07 -0.28 0.15 -0.61 0.543 8.6%

-0.30 -0.36 -0.23 -9.16 0.000 Fixed

-0.31 -0.39 -0.22 -7.10 0.000 Random

|                   | <i>Five-grass</i> | <i>Timothy</i> |
|-------------------|-------------------|----------------|
| Q                 | 5.69              | 4.73           |
| p                 | 0.22              | 0.45           |
| I <sup>2</sup>    | 29.75             | 0.00           |
| weighted mean RCI | <b>-29.6</b>      | <b>-19.2</b>   |
